# Supplementary material
Source: Springer Nature journal article supplement (https://www.springermedizin.de/resource/supplementary/12955_2007_413_MOESM2_ESM.pdf/9560370)

### All Patients (n = 356)

r = 0.94, p < 0.001

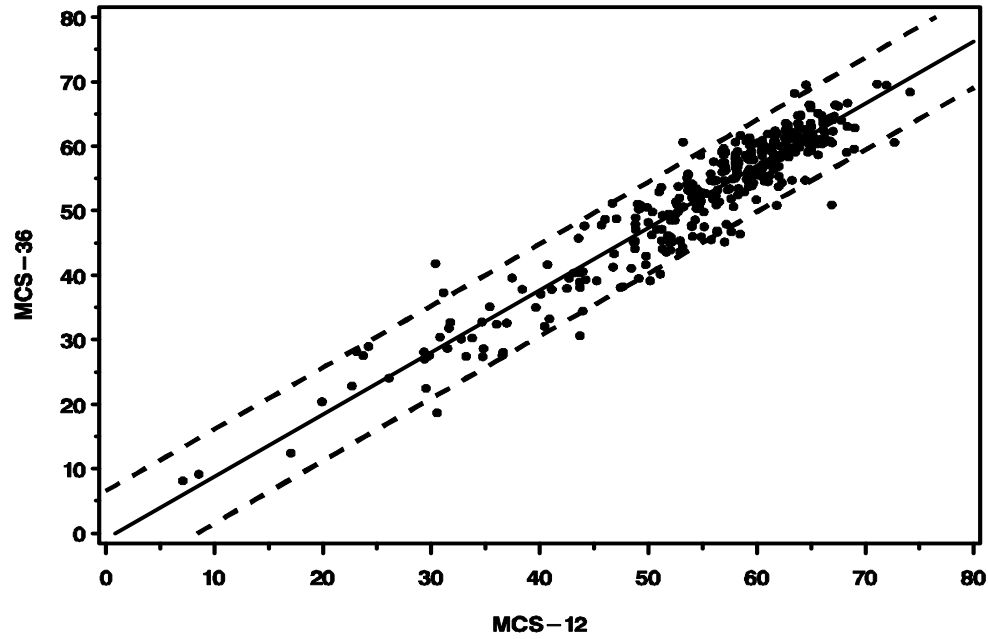

### Normal Weight Patients (n = 139)

r = 0.94, p < 0.001

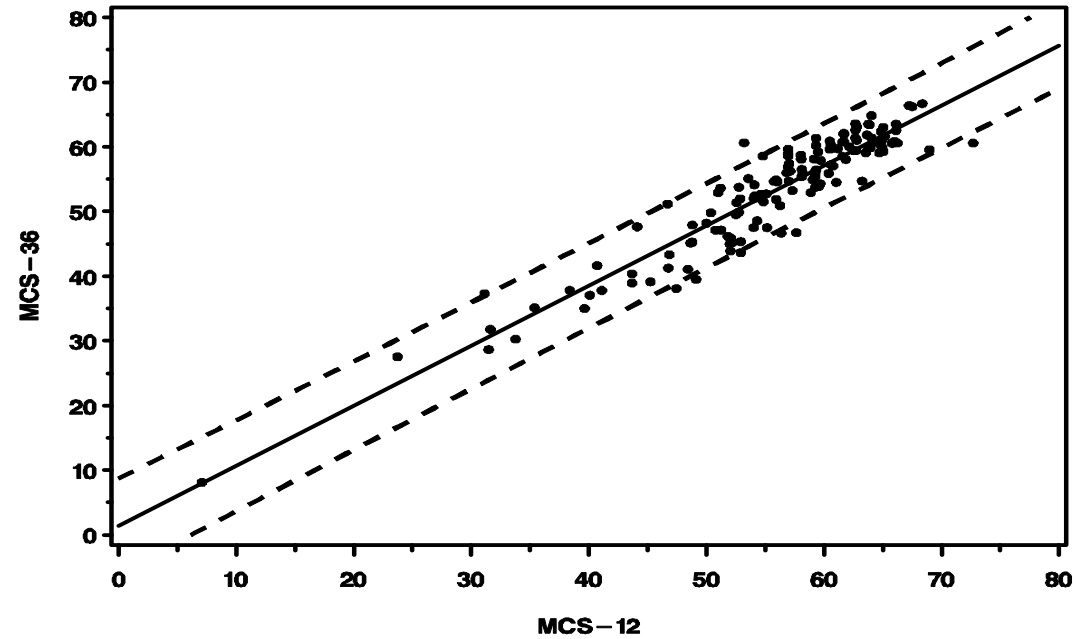

### Overweight Patients (n = 119)

r = 0.95, p < 0.001

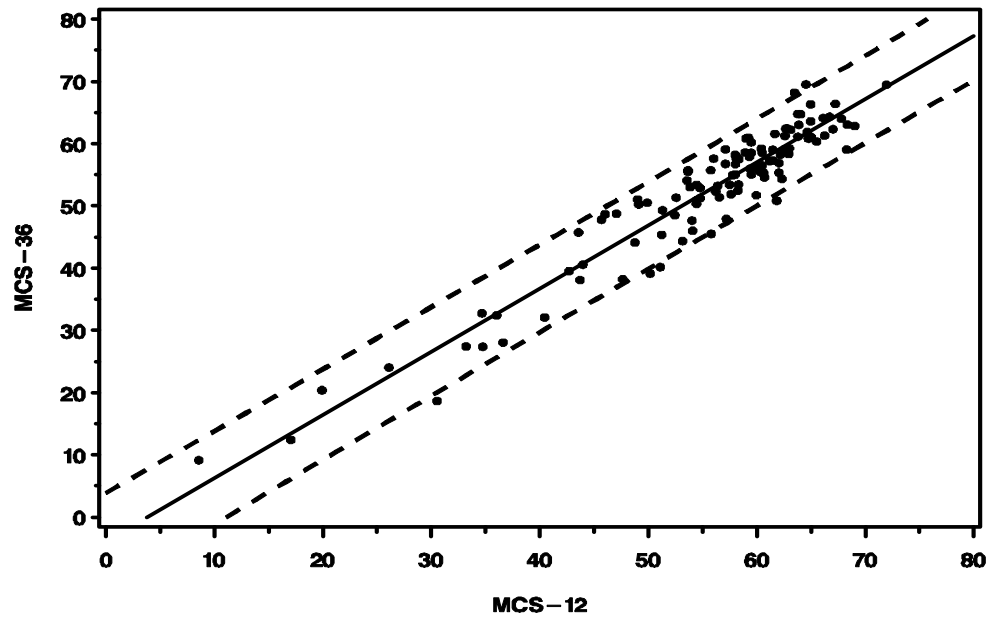

### Obese Patients (n = 98)

r = 0.94, p < 0.001

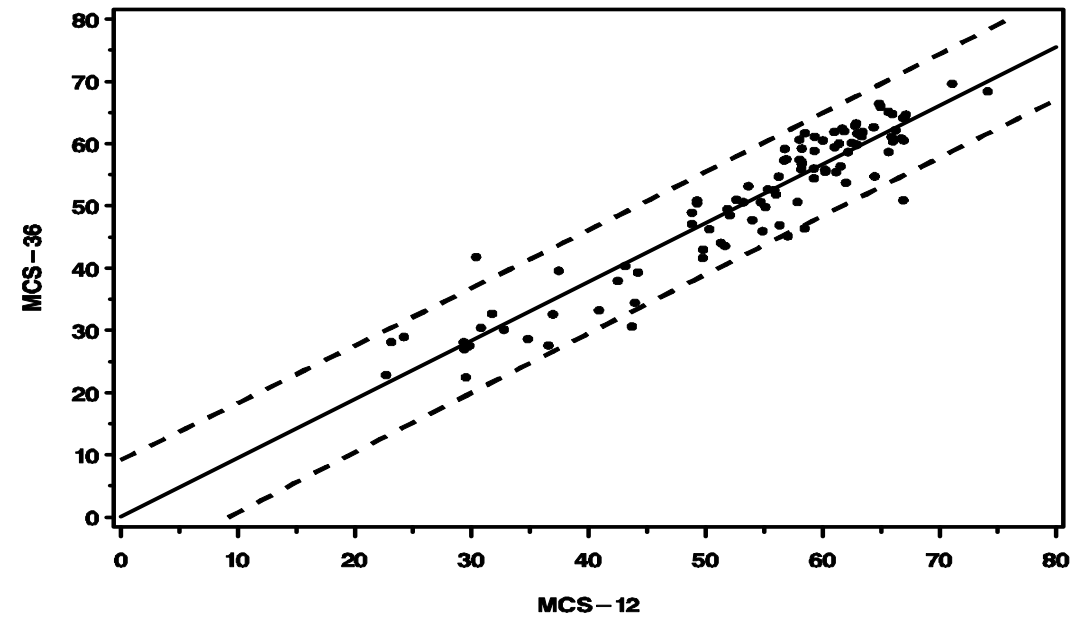

Supplement: MOESM2 [file 9560370]
